# Supplementary material for: Phosphorus Use Efficiency of Leafy Brassica sp. Grown in Three Contrasting Soils: Growth, Enzyme Activity and Phosphorus Fractionation
Source: MDPI journal article supplement (doi:10.3390/plants12061295), 2023-03-13
Supplement: s1 [file s1]

**Non-calcareous soils**

**Calcareous soils**

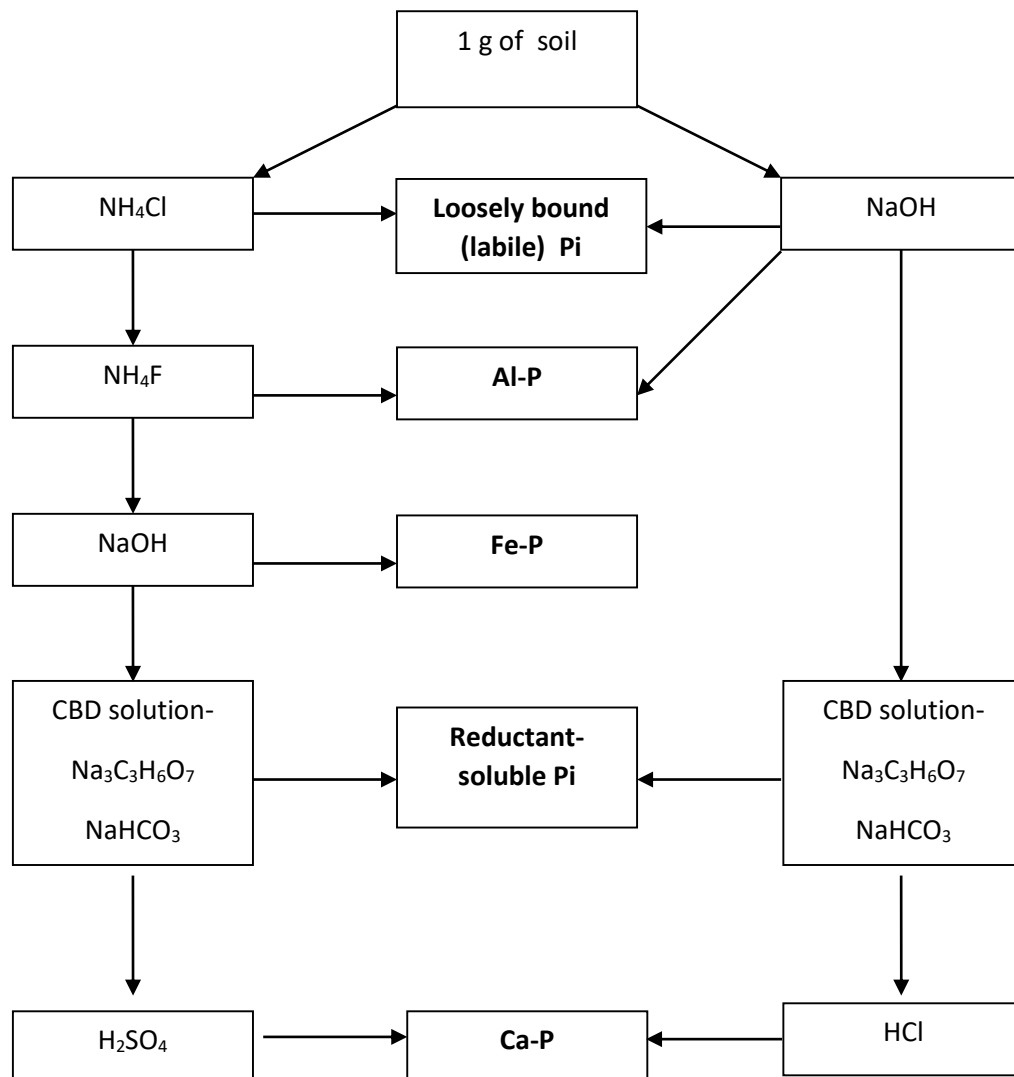

Figure S1. Scheme of inorganic P fractionation

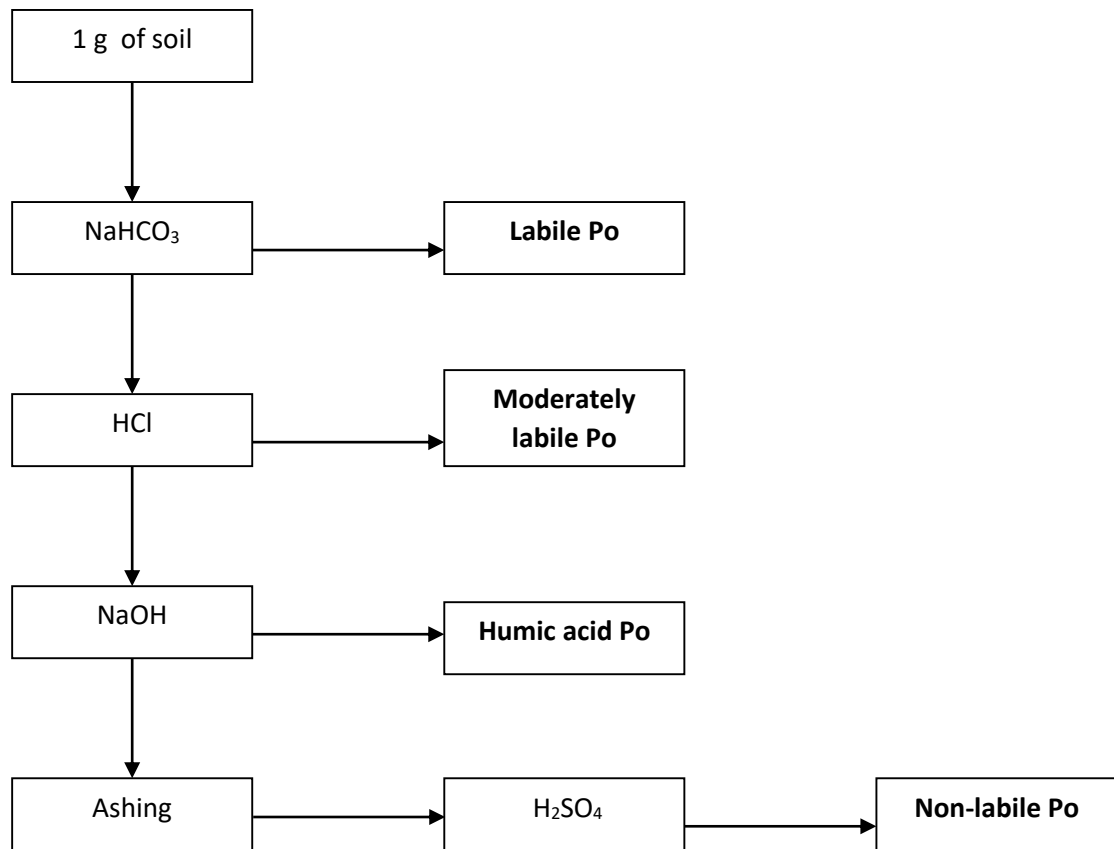

Figure S2. Scheme of organic P fractionation
